# Supplementary material for: Whole-Genome-Sequence-Based Characterization of Extensively Drug-Resistant Acinetobacter baumannii Hospital Outbreak
Source: PubMed Central journal article supplement (PMC6968657; doi:10.1128/msphere.00934-19), 2020-01-15
Supplement: mSphere.00934-19-st001.pdf [file mSphere.00934-19-st001.pdf]

| Patient | Sample | Source           | Sex | Age Range | Outcome  | Underlying Disease                                                                               | Date of specimen | GM MIC | GM 10 | AK MIC | AK 30 | TZP MIC | TZP 100/10 | CAZ 30 | FEP MIC | FEP 30 | IMP MIC | IMP 10 | MEM MIC | MEM 10 | CIP MIC | CIP 5 | LEV 5 | COL MIC | COL 50 | TMP-SMX MIC | TMP-SMX |     |     |  |
|---------|--------|------------------|-----|-----------|----------|--------------------------------------------------------------------------------------------------|------------------|--------|-------|--------|-------|---------|------------|--------|---------|--------|---------|--------|---------|--------|---------|-------|-------|---------|--------|-------------|---------|-----|-----|--|
|         |        |                  |     |           |          |                                                                                                  |                  |        |       |        |       |         |            |        |         |        |         |        |         |        |         |       |       |         |        |             |         |     |     |  |
| 1       | ACM-1  | DTA              | F   | 0-1       | Survived | Apnea                                                                                            | April-2016       | 8      |       | ≥256   |       | ≥256    |            |        | ≥128    |        | 8       |        | 8       |        | ≥32     |       |       | 0.94    |        | 1.5         |         |     |     |  |
| 2       | ACM-2  | Eye Culture      | F   | 0-1       | Survived | Premature, 2 <sup>nd</sup> twin, respiratory distress                                            | May-2016         | 8      |       | ≥256   |       | ≥256    |            |        | 128     |        | 8       |        | 8       |        | ≥32     |       |       | 1       |        | 1.5         |         |     |     |  |
| 3       | ACM-3  | DTA              | F   | 80-89     | Died     | Head trauma, multiple comorbidities                                                              | May-2016         | 4      |       | ≥256   |       | ≥256    |            |        | 128     |        | 4       |        | 8       |        | ≥32     |       |       | 0.09    |        | ≥32         |         |     |     |  |
| 4       | ACM-4  | BLOOD            | F   | 60-69     | Died     | Chemotherapy                                                                                     | June-2016        | ≥256   |       | ≥256   |       | ≥256    |            |        | ≥128    |        | 8       |        | 8       |        | ≥32     |       |       | 0.75    |        | ≥32         |         |     |     |  |
| 5       | ACM-5  | DTA              | M   | 60-69     | Died     | Head trauma, septicemia                                                                          | June-2016        | 8      |       | ≥256   |       | ≥256    |            |        | 128     |        | 8       |        | 8       |        | ≥32     |       |       | 1       |        | ≥32         |         |     |     |  |
| 6       | ACM-6  | BW               | F   | 50-59     | Died     | Multiple comorbidities, diabetes, foot amputation, sepsis                                        | June-2016        | ≥256   | ≥256  | ≥256   |       | ≥128    |            |        | 8       |        | 8       |        | 8       |        | ≥32     |       |       | 1       |        | ≥32         |         |     |     |  |
|         | ACM-8  | DTA              |     |           |          |                                                                                                  | June-2016        | ≥256   | ≥256  | ≥256   |       | 128     |            | 8      |         | 8      | 0.5     |        |         |        | ≥32     |       |       |         |        | 0.75        |         | ≥32 |     |  |
| 7       | ACM-7  | Surgical (abdm)  | F   | 50-59     | Died     | Acute myeloid leukemia, ulcer                                                                    | June-2016        | 12     |       | ≥256   |       | ≥256    |            |        | ≥128    |        | 8       |        | 8       |        | ≥32     |       |       | 0.38    |        | ≥32         |         |     |     |  |
| 8       | ACM-9  | DTA              | F   | 40-49     | Survived | LOC, intubated, fever, dysuria                                                                   | June-2016        | 8      |       | ≥256   |       | ≥256    |            |        | ≥128    |        | 8       |        | 4       |        | ≥32     |       |       | 0.13    |        | ≥32         |         |     |     |  |
| 9       | ACM-10 | BLOOD            | F   | 40-49     | Died     | Cardiac arrest, brain anoxia injury, sepsis                                                      | July-2016        | 0.19   |       | ≥256   |       | ≥256    |            |        | 1.5     |        | 0.5     |        | 1       |        | 0.25    |       |       | 0.13    |        | 0.25        |         |     |     |  |
| 10      | ACM-11 | DTA              | F   | 60-69     | Died     | Multiple comorbidities, hyponatremia, hyperkalemia(kidney injury)                                | July-2016        | 8      |       | 32     |       | ≥256    |            |        | 24      |        | >8      |        | >8      |        | ≥32     |       |       | 0.13    |        | ≥32         |         |     |     |  |
|         | ACM-18 | BW               |     |           |          |                                                                                                  | September-2016   | 8      |       | 96     |       | ≥256    |            | ≥128   |         | 8      |         | 8      |         | 8      |         | 8     |       | ≥32     |        |             | 0.06    |     | ≥32 |  |
| 11      | ACM-12 | BW               | M   | 40-49     | Survived | Respiratory distress, fever, lung pneumonia                                                      | August-2016      | 2      |       | 64     |       | ≥256    |            |        | 128     |        | 4       |        | 8       |        | ≥32     |       |       | 0.38    |        | ≥32         |         |     |     |  |
| 12      | ACM-13 | DTA              | M   | 60-69     | Died     | Jaundice                                                                                         | August-2016      | 1.5    |       | 32     |       | ≥256    |            |        | 32      |        | 2       |        | 4       |        | ≥32     |       |       | 0.5     |        | ≥32         |         |     |     |  |
| 13      | ACM-14 | DTA              | F   | 70-79     | Died     | Decreased LOC, dysarthria, severe respiratory distress                                           | August-2016      | 0.25   |       | 20     |       | 0.02    |            |        | 2       |        | 0.25    |        | 4       |        | 0.19    |       |       | 0.13    |        | 0.19        |         |     |     |  |
| 14      | ACM-15 | DTA              | F   | 50-59     | Died     | Lung adenocarcinoma                                                                              | September-2016   | 16     |       | 64     |       | ≥256    |            |        | 48      |        | 8       |        | 8       |        | ≥32     |       |       | 0.13    |        | ≥32         |         |     |     |  |
| 15      | ACM-17 | DTA              | F   | 50-59     | Survived | Decreased level of consciousness, fever, cough                                                   | September-2016   | 16     |       | 96     |       | ≥256    |            |        | 64      |        | 8       |        | 8       |        | ≥32     |       |       | 0.38    |        | ≥32         |         |     |     |  |
|         | ACM-19 | Sputum           |     |           |          |                                                                                                  | September-2016   | 12     |       | 48     |       | ≥256    |            | 128    |         | 8      |         | 8      |         | 8      |         | 8     |       | ≥32     |        |             | 0.02    |     | ≥32 |  |
| 16      | ACM-20 | Surgical         | F   | 60-69     | Survived | Malignant melanoma of skin                                                                       | September-2016   | 12     |       | 32     |       | ≥256    |            |        | 64      |        | 4       |        | 8       |        | ≥32     |       |       | 0.02    |        | ≥32         |         |     |     |  |
| 17      | ACM-21 | Surgical         | M   | 80-89     | Died     | Hyperplasia of prostate, diabetes, septic shock                                                  | September-2016   | 16     |       | ≥256   |       | ≥256    |            |        | 128     |        | 4       |        | 8       |        | ≥32     |       |       | 0.75    |        | ≥32         |         |     |     |  |
|         | ACM-31 | DTA              |     |           |          |                                                                                                  | October-2016     | 4      |       | 64     |       | ≥256    |            | 24     |         | ≥32    |         | 8      |         | 8      |         | ≥32   |       |         | 0.25   |             | ≥32     |     |     |  |
|         | ACM-35 | Surgical         |     |           |          |                                                                                                  | October-2016     | 16     |       | ≥256   |       | ≥256    |            | 96     |         | ≥32    |         | 8      |         | 8      |         | 8     |       | ≥32     |        |             | 0.13    |     | ≥32 |  |
| 18      | ACM-16 | DTA              | F   | 70-79     | Died     | Meningioma                                                                                       | September-2016   | 16     |       | 32     |       | ≥256    |            |        | ≥128    |        | ≥32     |        | 8       |        | ≥32     |       |       | 0.19    |        | ≥32         |         |     |     |  |
| 19      | ACM-22 | BLOOD            | M   | 2-9       | Survived | Deteriorating edema anuria, sepsis, seizures, pneumonia, surgery (peritoneal catheter insertion) | September-2016   | ≥256   | ≥256  | ≥256   |       | ≥128    |            |        | ≥32     |        | 16      |        | ≥32     |        |         |       |       | 0.38    |        | ≥32         |         |     |     |  |
|         | ACM-24 | P. FLUID         |     |           |          |                                                                                                  | September-2016   | ≥256   | ≥256  | ≥256   |       | ≥128    |            | ≥32    |         | 8      |         | ≥32    |         |        |         |       |       |         |        | 0.75        |         | ≥32 |     |  |
|         | ACM-25 | BLOOD            |     |           |          |                                                                                                  | September-2016   | 6      |       | 48     |       | ≥256    |            | ≥128   |         | ≥32    |         | 8      |         | 8      |         | 8     |       | ≥32     |        |             | 1       |     | ≥32 |  |
|         | ACM-26 | P Fluid          |     |           |          |                                                                                                  | September-2016   | ≥256   | ≥256  | 0.16   |       | ≥128    |            | ≥32    |         | 8      |         | 8      |         | 8      |         | 8     |       | ≥32     |        |             | 0.13    |     | ≥32 |  |
|         | ACM-28 | BLOOD            |     |           |          |                                                                                                  | September-2016   | 4      |       | 64     |       | ≥256    |            | 48     |         | ≥32    |         | 8      |         | 8      |         | 8     |       | ≥32     |        |             | 0.75    |     | ≥32 |  |
|         | ACM-29 | Peritoneal       |     |           |          |                                                                                                  | September-2016   | ≥256   | ≥256  | ≥256   |       | 32      |            | ≥32    |         | 8      |         | 8      |         | 8      |         | 8     |       | ≥32     |        |             | 0.25    |     | ≥32 |  |
|         | ACM-30 | Surgical         |     |           |          |                                                                                                  | September-2016   | 3      |       | 128    |       | ≥256    |            | ≥128   |         | ≥32    |         | 16     |         | 16     |         | 16    |       | ≥32     |        |             | 0.38    |     | ≥32 |  |
| 20      | ACM-23 | DTA              | M   | 60-69     | Survived | Dyspnea, decreased levels of consciousness, respiratory distress                                 | October-2016     | 2      |       | 16     |       | ≥256    |            |        | 48      |        | ≥32     |        | 4       |        | ≥32     |       |       | 0.75    |        | ≥32         |         |     |     |  |
| ACM-32  | DTA    | September-2016   |     |           |          |                                                                                                  | 12               |        | 256   |        | ≥256  |         | 32         |        | ≥32     |        | 4       |        | 4       |        | 4       |       | ≥32   |         |        | 0.5         |         | ≥32 |     |  |
| 21      | ACM-27 | DTA              | M   | 60-69     | Died     | Respiratory distress, palsy, septic shock                                                        | September-2016   | 16     |       | 64     |       | ≥256    |            |        | ≥128    |        | ≥32     |        | 8       |        | ≥32     |       |       | 0.05    |        | ≥32         |         |     |     |  |
| 22      | ACM-34 | BLOOD            | F   | 0-1       | Survived | Premature, bacterial sepsis                                                                      | October-2016     | ≥256   | ≥256  | ≥256   |       | ≥128    |            |        | ≥32     |        | ≥32     |        | 8       |        | ≥32     |       |       | 0.5     |        | 4           |         |     |     |  |
|         | ACM-36 | surgical (Umbil) |     |           |          |                                                                                                  | October-2016     | ≥256   | ≥256  | ≥256   |       | ≥128    |            | ≥32    |         | 8      |         | 8      |         | 8      |         | 8     |       | ≥32     |        |             | 0.13    |     | 1.5 |  |
| 23      | ACM-37 | DTA              | M   | 90-99     | Died     | Hyperplasia of prostate, bacterial pneumonia, septic shock, atrioventricular block               | December-2016    | ≥256   | ≥256  | ≥256   |       | 128     |            |        | 128     |        | ≥32     |        | 8       |        | ≥32     |       |       | 0.19    |        | ≥32         |         |     |     |  |
| 24      | ACM-38 | -                | -   | -         | -        | -                                                                                                | -                | 1      |       | ≥256   |       | ≥256    |            |        | 46      |        | ≥32     |        | 8       |        | ≥32     |       |       | 0.5     |        | ≥32         |         |     |     |  |
| 25      | ACM-39 | -                | -   | -         | -        | -                                                                                                | -                | 12     |       | 64     |       | ≥256    |            |        | 48      |        | ≥32     |        | 8       |        | ≥32     |       |       | 0.13    |        | ≥32         |         |     |     |  |
| 26      | ACM-40 | -                | M   | 50-59     | -        | -                                                                                                | -                | ≥256   |       | ≥256   |       | ≥256    |            |        | ≥128    |        | ≥32     |        | 8       |        | ≥32     |       |       | 0.13    |        | ≥32         |         |     |     |  |
| 27      | ACM-41 | -                | -   | -         | -        | -                                                                                                | -                | 24     |       | 96     |       | ≥256    |            |        | ≥128    |        | ≥32     |        | 8       |        | ≥32     |       |       | 0.13    |        | ≥32         |         |     |     |  |
