# Supplementary material for: Whole-Genome-Sequence-Based Characterization of Extensively Drug-Resistant Acinetobacter baumannii Hospital Outbreak
Source: PubMed Central journal article supplement (PMC6968657; doi:10.1128/msphere.00934-19), 2020-01-15
Supplement: mSphere.00934-19-st002.pdf [file mSphere.00934-19-st002.pdf]

| Sample | Plasmid   | Accession# | % Identity | <i>bla</i> <sub>OXA-72</sub> | <i>bla</i> <sub>OXA-23</sub> |
|--------|-----------|------------|------------|------------------------------|------------------------------|
| ACM-1  | ABAY15001 | MK386684.1 | 99         | N                            | N                            |
| ACM-1  | AB34299   | CP014293.1 | 99         | N                            | N                            |
| ACM-2  | pA85-2    | CP021786.1 | 100        | N                            | N                            |
| ACM-3  | pA85-2    | CP021786.1 | 100        | N                            | N                            |
| ACM-4  | pMAL-2    | KX230794.1 | 100        | N                            | N                            |
| ACM-4  | pA85-2    | CP021786.1 | 100        | N                            | N                            |
| ACM-5  | pA85-2    | CP021786.1 | 100        | N                            | N                            |
| ACM-6  | pA85-2    | CP021786.1 | 100        | N                            | N                            |
| ACM-7  | pMAL-2    | KX230794.1 | 100        | N                            | N                            |
| ACM-7  | pMAL-1    | KX230793.1 | 100        | Y                            | N                            |
| ACM-8  | pA85-2    | CP021786.1 | 100        | N                            | N                            |
| ACM-9  | pA85-2    | CP021786.1 | 100        | N                            | N                            |
| ACM-11 | pTG22653  | CP039519.1 | 99         | N                            | N                            |
| ACM-11 | pMAL-1    | KX230793.1 | 100        | Y                            | N                            |
| ACM-12 | pMAL-1    | KX230793.1 | 100        | Y                            | N                            |
| ACM-12 | pMAL-2    | KX230794.1 | 100        | N                            | N                            |
| ACM-13 | pMAL-1    | KX230793.1 | 100        | Y                            | N                            |
| ACM-15 | pMAL-2    | KX230794.1 | 100        | N                            | N                            |
| ACM-15 | pMAL-1    | KX230793.1 | 100        | Y                            | N                            |
| ACM-16 | pMAL-1    | KX230793.1 | 100        | Y                            | N                            |
| ACM-17 | pTG22653  | CP039519.1 | 99         | N                            | N                            |
| ACM-17 | pMAL-1    | KX230793.1 | 100        | Y                            | N                            |
| ACM-18 | pMAL-1    | KX230793.1 | 100        | Y                            | N                            |
| ACM-20 | pMAL-1    | KX230793.1 | 100        | Y                            | N                            |
| ACM-21 | pMAL-1    | KX230793.1 | 100        | Y                            | N                            |
| ACM-22 | AB34299   | CP014293.1 | 99         | N                            | N                            |
| ACM-23 | pMAL-1    | KX230793.1 | 100        | Y                            | N                            |
| ACM-24 | pMAL-1    | KX230793.1 | 100        | Y                            | N                            |
| ACM-25 | pMAL-1    | KX230793.1 | 100        | Y                            | N                            |
| ACM-25 | pTG22653  | CP039519.1 | 99         | N                            | N                            |
| ACM-25 | pMAL-2    | KX230794.1 | 100        | N                            | N                            |
| ACM-27 | pMAL-1    | KX230793.1 | 100        | Y                            | N                            |
| ACM-29 | AB34299   | CP014293.1 | 99         | N                            | N                            |
| ACM-29 | pMAL-2    | KX230794.1 | 100        | N                            | N                            |
| ACM-31 | pMAL-2    | KX230794.1 | 100        | N                            | N                            |
| ACM-31 | pMAL-1    | KX230793.1 | 100        | Y                            | N                            |
| ACM-33 | AB34299   | CP014293.1 | 99         | N                            | N                            |
| ACM-34 | pA85-2    | CP021786.1 | 100        | N                            | N                            |
| ACM-35 | ABAY04001 | MK386680.1 | 99         | N                            | N                            |
| ACM-35 | pMAL-2    | KX230794.1 | 100        | N                            | N                            |
| ACM-36 | pA85-2    | CP021786.1 | 100        | N                            | N                            |
| ACM-37 | pA85-2    | CP021786.1 | 100        | N                            | N                            |
| ACM-38 | ABAY15001 | MK386684.1 | 100        | N                            | N                            |
| ACM-38 | AB34299   | CP014293.1 | 99         | N                            | N                            |
| ACM-41 | pMAL-2    | KX230794.1 | 100        | N                            | N                            |
| ACM-41 | pMAL-1    | KX230793.1 | 100        | Y                            | N                            |
