# Supplementary material for: Whole-Genome-Sequence-Based Characterization of Extensively Drug-Resistant Acinetobacter baumannii Hospital Outbreak
Source: PubMed Central journal article supplement (PMC6968657; doi:10.1128/msphere.00934-19), 2020-01-15
Supplement: mSphere.00934-19-st003.pdf [file mSphere.00934-19-st003.pdf]

| <b>ACM Label</b> | <b>Accession Numbers</b> | <b>Nb of contigs</b> | <b>N50</b> | <b>Coverage</b> |
|------------------|--------------------------|----------------------|------------|-----------------|
| ACM-1            | MJAY00000000             | 108                  | 165,005    | 68              |
| ACM-2            | MJAZ00000000             | 76                   | 161,735    | 72              |
| ACM-3            | MJBB00000000             | 107                  | 162,580    | 151             |
| ACM-4            | MJBA00000000             | 93                   | 168,008    | 88              |
| ACM-5            | PYCX00000000             | 107                  | 165,005    | 30              |
| ACM-6            | MJBC00000000             | 84                   | 168,008    | 62              |
| ACM-7            | MJBD00000000             | 132                  | 162,580    | 74              |
| ACM-8            | MJBE00000000             | 103                  | 162,244    | 100             |
| ACM-9            | PYCV00000000             | 126                  | 162,580    | 30              |
| ACM-11           | PYCW00000000             | 111                  | 133,397    | 30              |
| ACM-12           | PYCY00000000             | 135                  | 121,813    | 30              |
| ACM-13           | PYCZ00000000             | 187                  | 132,022    | 30              |
| ACM-14           | PYDA00000000             | 102                  | 121,152    | 30              |
| ACM-15           | PYDB00000000             | 124                  | 133,397    | 30              |
| ACM-16           | PYDC00000000             | 118                  | 132,002    | 30              |
| ACM-17           | PYDD00000000             | 124                  | 124,392    | 30              |
| ACM-18           | PYDE00000000             | 120                  | 132,002    | 30              |
| ACM-19           | PYDF00000000             | 132                  | 106,813    | 30              |
| ACM-20           | PYDG00000000             | 220                  | 118,630    | 30              |
| ACM-21           | PYDH00000000             | 112                  | 118,753    | 30              |
| ACM-22           | PYDI00000000             | 126                  | 168,008    | 30              |
| ACM-23           | PYDJ00000000             | 126                  | 118,871    | 30              |
| ACM-24           | PYDK00000000             | 113                  | 110,190    | 30              |
| ACM-25           | PXYP00000000             | 126                  | 106,424    | 30              |
| ACM-26           | PYDL00000000             | 1,926                | 8,266      | 30              |
| ACM-27           | PYDM00000000             | 142                  | 131,998    | 30              |
| ACM-28           | PYDN00000000             | 124                  | 107,062    | 30              |
| ACM-29           | PYDO00000000             | 187                  | 143,070    | 30              |
| ACM-30           | PYDP00000000             | 118                  | 111,165    | 30              |
| ACM-31           | PYDQ00000000             | 136                  | 132,002    | 30              |
| ACM-32           | PYDR00000000             | 136                  | 107,062    | 30              |
| ACM-33           | PYDS00000000             | 102                  | 165,005    | 30              |
| ACM-34           | QAGN00000000             | 102                  | 165,005    | 30              |
| ACM-35           | QEHN00000000             | 179                  | 111,165    | 30              |
| ACM-36           | QAGO00000000             | 99                   | 165,005    | 30              |
| ACM-37           | QAGP00000000             | 123                  | 162,244    | 30              |
| ACM-38           | QAGQ00000000             | 91                   | 194,416    | 30              |
| ACM-39           | QAGR00000000             | 315                  | 84,717     | 30              |
| ACM-40           | QAGS00000000             | 160                  | 147,706    | 30              |
| ACM-41           | QAGT00000000             | 99                   | 134,794    | 30              |
